# Supplementary material for: Geological Controlling Factors of Low Resistivity Shale and Their Implications on Reservoir Quality: A Case Study in the Southern Sichuan Basin, China
Source: MDPI journal article supplement (doi:10.3390/en15165801), 2022-08-10
Supplement: s1 [file s1]

Archive with 5 entries (5 files):
- energies-1664157-Supplementary.pdf
- Table S1.xlsx
- Table S2.xlsx
- Table S3.xlsx
- Table S4.xlsx
