# Supplementary material for: Geological Controlling Factors of Low Resistivity Shale and Their Implications on Reservoir Quality: A Case Study in the Southern Sichuan Basin, China
Source: MDPI journal article supplement (doi:10.3390/en15165801), 2022-08-10
Supplement: s1 [file s1 › Table S1.xlsx]

## Sheet: Sheet1
Resistivity(Ω·m)	Illite Content (%)	Ro (%)	Clay minerals (%)	Anhydrite (%)	Zeolite (%)	Quartz (%)	Orthoclase (%)	Plagioclase(%)	Calcite (%)	Dolomite (%)	Siderite (%)	Pyrite (%)	Brittle mineral (%)	TOC(%)	TOS(%)	Porosity (%)	Water Saturation (%)	Total gas content (m3/t)
11.516	12.18	3.38	20.3	0	0	45.4	0	6.3	16.1	9.2	0	2.7	79.7	1.234	0.9913	6.09595	49.9816	0.93187
9.258	17.918	3.39	28.9	0	0	46.4	0	9.4	11.9	3.4	0	0	71.1	1.488	0.8505	5.22403	56.1546	0.93241
13.884	12.728		29.6	0	0	42.3	0	7.6	13.2	4.6	0	2.7	70.4	1.322	1.675	5.11126	59.0933	0.93284
12.282	14.448	3.33	33.6	0	0	45.9	0	3.7	10.8	4.8	0	1.2	66.4	1.541	0.7703	5.72828	65.0633	0.92682
14.412	12.903		25.3	0	0	56.3	0	6.8	8.8	2.8	0	0	74.7	1.239	0.7289	4.85241	65.0127	0.89782
5.812	12.691		25.9	0	0	49.1	7.3	8.7	4.6	3.7	0	0.7	74.1	1.251	0.7399	5.05847	58.3169	0.87204
11.897	18.212		31.4	0	0	49.6	0	6.1	9.3	3.2	0	0.4	68.6	1.278	0.6452	5.22122	55.8941	0.84627
13.492	16.815		29.5	0	0	48.9	0	8	7.1	0	0	6.5	70.5	1.291	1.199	5.42169	53.2301	0.82049
17.94	18.6		30	0	0	46.4	0	8.8	8.3	6.5	0	0	70	1.267	0.8947	4.54764	58.1842	0.80686
15.2585	17.55		27.8	0	0	61.8	0	4.6	5.8	0	0	0	72.2	1.496	0.6479	5.19241	53.8282	0.81806
12.417	18.9		27	0	0	59.2	0	8.1	5.7	0	0	0	73	1.432	0.6399	4.87292	55.5992	0.83067
18.114	12.74	3.25	26	0	0	55.4	0	9.2	6.9	2.5	0	0	74	1.24	0.5659	4.51806	58.9773	0.84327
19.7	14.31		31.8	0	0	51.4	0	4.7	6.9	0.3	0	4.9	68.2	1.188	0.8594	4.59632	54.9561	0.84976
20.309	10.578		24.6	0	0	50.8	0	7.3	8.2	4.5	0	4.6	75.4	1.178	0.8703	4.13639	58.4814	0.85051
15.19	14.04		27	0	0	52.7	0	13.7	6.6	0	0	0	73	1.525	1.131	5.32052	57.3349	0.85125
4.251	18.476		29.8	0	0	44.6	0	9.8	9.9	5.9	0	0	70.2	1.425	0.7249	4.52779	58.3683	0.8521
22.43	9.25		25	0	0	46.9	0	12.4	10.9	1.5	0	3.3	75	1.229	0.8736	3.91916	54.6964	0.85284
21.086	8.82		18	0	0	63.5	0	9.3	9.2	0	0	0	82	1.334	0.9934	4.22896	56.3742	0.86952
19.018	7.831		19.1	0	0	41	0	14	9	12.8	0	4.1	80.9	1.406	1.083	3.7289	59.2818	0.8845
22.063	12.331		20.9	0	0	43.4	0	19.4	8.1	3.9	0	4.3	79.1	1.305	1.034	3.47639	55.5984	0.89615
27.205	8.729		20.3	0	0	51.4	0	9.6	10.7	4	0	4	79.7	1.275	0.8718	3.84138	48.5919	0.90779
4.643	10.146		17.8	0	0	52.3	0	15.8	10.2	3.5	0	0.4	82.2	1.434	0.7824	3.54771	54.4739	0.93745
27.479	13.575		18.1	0	0	50.6	0	20	8.5	2.8	0	0	81.9	1.277	0.6548	4.84788	44.2054	0.96289
24.279	7.656		23.2	0	0	48.2	0	11.4	10.6	6.2	0	0.4	76.8	1.667	1.04	3.5705	39.7931	0.98832
26.249	17.214		30.2	0	0	44	0	12.4	10.4	2.1	0	0.9	69.8	1.303	0.9073	3.94879	49.136	1.01058
25.574	9.798		21.3	0	0	51.2	0	12.2	8.7	4.7	0	1.9	78.7	1.298	1.198	3.55665	56.881	1.03284
17.045	19.44		27	0	0	51.6	0	7.3	7.1	4.8	0	2.2	73	1.388	0.7501	5.54363	50.4663	1.0551
17.954	15.252		24.6	0	0	46.6	9.2	8.4	10	1.2	0	0	75.4	1.601	1.133	4.87183	47.3175	1.06875
26.865	16.112		30.4	0	0	41.3	0	13.7	9.8	3.7	0	1.1	69.6	1.427	0.9692	3.58864	52.395	1.07343
31.204	9.936		18.4	0	0	43.8	7.6	8.4	17	3.4	0	1.4	81.6	1.407	0.988	3.34755	57.432	1.07811
18.413	9.933		23.1	0	0	43.6	6.2	12	9.9	4.8	0	0.4	76.9	1.835	1.421	4.06908	51.2046	1.08346
22.077	13.181		26.9	0	0	49.4	0	9.9	9.1	4.3	0	0.4	73.1	1.782	1.209	4.30682	47.8112	1.08814
22.908	10.01		15.4	0	0	46.1	4.2	13.8	12.9	5.3	0	2.3	84.6	1.529	1.356	4.06096	47.7748	1.1333
19.205	11.4		20	0	0	44.3	0	15.6	13.1	7	0	0	80	1.613	1.055	4.469	48.7	1.24474
9.559	12.789		26.1	0	0	54	0	7.4	7.2	3.9	0	1.4	73.9	2.658	1.877	6.02929	48.8072	1.36857
5.288	12.532		24.1	0	0	53.3	0	9.4	9.1	2.6	0	1.5	75.9	3.549	3.062	6.95423	45.4146	1.46763
2.463	12.932		24.4	0	0	54.1	0	8.9	10.5	0.4	0	1.7	75.6	3.59	2.167	6.99816	44.0739	1.54193
4.941	18.915		29.1	0	0	44.6	0	8.7	9.1	4.9	0	3.6	70.9	3.694	2.025	7.56577	43.4312	1.63688
4.768	15	3.48	23.1	0	0	49.6	0	6.9	9.9	4.7	0	5.8	76.9	3.594	3.698	6.26872	45.4986	1.69772
4.219	16.5	3.5	22.5	0	0	54.7	0	5.7	6.4	4.4	0	6.3	77.5	6.305	3.113	8.70347	28.6713	1.77886
5.176	15		19.3	0	0	54.2	0	5.5	11.7	1.7	0	7.6	80.7	6.044	2.816	7.88926	32.8834	1.85999
6.022	20.02	3.42	26	0	0	53.5	0	3.7	7.2	6.5	0	3.1	74	4.824	1.501	6.4907	28.8216	1.95126
5.982	21		23	0	0	50	0	9	9.6	5.3	0	3.1	77	5.257	1.745	6.18164	31.9065	2.00009
4.696	15	3.48	19.2	0	0	58	0	4.6	9	6.7	0	2.5	80.8	4.904	2.27	6.86468	26.5718	1.97041
11.0675	8.036		19.6	0	0	52.8	0.6	4.7	10.3	9.4	0	2.6	80.4	4.386	1.943	5.53793	30.6695	1.93224
8.017	20.4		34	0	0	42.2	0	0.4	10.4	12.1	0	0.9	66	4.598	1.181	5.69069	17.7062	1.89831
12.847	12.8		15.5	0	0	50.7	0	3.2	10.2	14.4	0	6	84.5	3.92	1.812	5.25517	27.7638	1.87287
11.231	12		12.6	0	0	62	0	2.7	13.3	7.7	0	1.7	87.4	3.995	1.21	4.04534	27.3124	1.81086
12.141	16		33	0	0	24.2	0	14.4	12.7	11.1	0	4.6	67	3.879	1.609	4.53294	32.9392	1.75764
7.247	21		32	0	0	38.7	0	3.1	12.2	14	0	0	68	3.819	1.18	5.12848	31.8705	1.71963
11.529	16		33	0	0	52	0	3	18	12	0	0	85	3.872	1.206	4.16977	31.8685	1.68162
15	13		32	0	0	34.9	0	1.8	16.6	11.6	0	3.1	68	3.367	1.365	3.68636	30.4731	1.63601
11.893	22		22	0	0	45.6	0	5.8	14.5	8.6	0	3.5	78	3.688	1.393	6.85514	39.3048	1.59973
11.439	14		23	0	0	51.6	0	2.4	11.3	9.7	0	2	77	5.939	1.404	5.8737	28.9178	1.57241
5.279	22	3.68	22	0	0	35.4	0	6.7	23.9	8.7	0	3.3	78	8.345	0.9954	5.078	19.8515	1.54119
1.644	23		44.5	0	0	42	1	3	5	3	0	1.5	55.5	1.71		1.39	64	0.11686
3.232	29	3.77	53	0	0	36	0	2	5	3	0	1	47	1.47		1.14	65	0.14189
2.966	36		41	0	0	44	1	3	7	2	0	2	59	1.25		1	70	0.17997
4.831	35	3.75	36	0	0	42.5	6	8	3	3	0	1.5	64	0.34		0.35	72	0.20471
3.787	29	3.76	47	0	0	45	0	2	3	2	0	1	53	1.17		0.69	64	0.21543
3.392	30		42.5	0	0	46	1	3	4	2	0	1.5	57.5	1.3		0.8	68	0.21272
2.793	36		54	0	0	33	1	3	5	3	0	1	46	1.68		0.97	66	0.197
3.644	33		39	0	0	45	2	4	7	2	0	1	61	1.4		0.95	62	0.19544
3.203	37		41.5	0	0	44	2	4	5	2	0	1.5	58.5	1.48		1.23	55	0.21365
4.025	33		40	0	0	46.8	2	4	4	2	0	1.2	60	1.46		1.06	57	0.18602
5.964	25		40	0	0	44.8	3	5	4	2	0	1.2	60	1.57		0.75	58	0.15609
5.525	33		45.8	0	0	40	2	4	5	2	0	1.2	54.2	1.21		0.54	59	0.17244
5.077	27		47.8	0	0	40	1	3	5	2	0	1.2	52.2	1.33		0.58	88	0.19645
1.546	33		38	0	0	46	4.8	4	3	3	0	1.2	62	1.38		0.53	80.77	0.14336
2.928	32		37	0	0	42	6	6.8	3	4	0	1.2	63	1.18		0.54	78	0.1659
2.847	28		30	0	0	47.8	7	7	3	4	0	1.2	70	1.25		0.43	74	0.19049
3	26		32	0	0	47.8	5	7	3	4	0	1.2	68	1.21		0.43	70	0.22328
2.416	29		40	0	0	41	5.8	6	4	2	0	1.2	60	1.81		1.23	77	0.24288
2.444	23		36	0	0	42	6.8	6	5	3	0	1.2	64	1.49		0.56	73	0.2609
2.885	42		46	0	0	42	0	2	3	6	0	1	54	1.83		0.62	78	0.2805
2.358	32	3.79	35	0	0	42.8	5	7	5	4	0	1.2	65	1.36		0.71	77	0.29744
2.1975	32		33	0	0	41.8	5	7	7	5	0	1.2	67	1.54		0.86	66	0.31065
2.4	21		30	0	0	42.8	4	6	12	4	0	1.2	70	1.56		1.38	58	0.27193
2.612	28		30	0	0	42	5	7.8	10	4	0	1.2	70	1.55		0.88	66	0.22549
3.552	27		37	0	0	40	5	7	6.9	3	0	1.1	63	1.78		0.67	67	0.17764
3.762	32		36	0	0	42	4	5.9	7	4	0	1.1	64	1.74		0.6	63	0.14229
2.575	30		37	0	0	40	5	6.9	7	3	0	1.1	63	2.14		0.93	68	0.1832
1.611			45.9	0	0	22.1	0	2	10	15	0	5	54.1	2.53		3.07	53	0.23579
1.923		3.86	48	0	0	22	0	2	12	15	0	1	52	3.21		3.6	50	0.25933
1.388			49.5	0	0	35	0	0	6	8	0	1.5	50.5	3.48		5.2	46	0.27419
1.302			61	0	0	30.5	0	0	3	4	0	1.5	39	4.02		5.6	47	0.27742
1.336			51	0	0	34.5	0	0	5	8	0	1.5	49	3.56		7	30	0.28064
1.521			33.5	0	0	50	0	0	5	10	0	1.5	66.5	3.63		6	39	0.27983
0.96			48	0	0	35.5	0	1	2	8	0	5.5	52	3.9		1.84	46	0.27638
0.6145			45.5	0	0	25	0	1	5	21	0	2.5	54.5	3.74		2.39	47	0.31625
0.818			52	0	0	13.5	0	0	8	25	0	1.5	48	6.45		7	43	0.36622
0.488			59	0	0	10.5	0	0	10	18	0	2.5	41	4.77		1.18	50	0.31486
0.243			34.5	0	0	23	0	1	15	25	0	1.5	65.5	5.14		1.53	52	0.25323
0.279			30.5	0	0	23	0	0	26	18	0	2.5	69.5	4.95		0.98	55	0.23639
0.2665			42	0	0	19	0	0	25	12	0	2	58	4.66		0.98	56	0.23758
0.252			41.5	0	0	15	0	1	25	15	0	2.5	58.5	4.6		0.82	58	0.23209
0.269			56	0	0	7.5	0	0	25	10	0	1.5	44	3.85		1.07	59	0.22567
0.2495			59.5	0	0	8	0	0	25	6	0	1.5	40.5	4.09		1.04	62	0.22957
0.25			47.5	0	0	10.5	0	0	22	18	0	2	52.5	3.94		0.97	66	0.24712
0.152			44.5	0	0	10.5	0	0	23	20	0	2	55.5	4.1		0.82	62	0.25438
0.137			60	0	0	9	0	0	12	17	0	2	40	3.86		0.87	73	0.25546
0.14			46	0	0	13.5	0	0	15	23	0	2.5	54	4.26		0.92	74	0.27449
0.14			35	0	0	14	0	0	23	26	0	2	65	3.44		0.83	94.08	0.30564
0.119			41	0	0	12	0	0	28	18	0	1	59	3.52		0.83	88	0.34168
0.154			41	0	0	12	0	0	32	16	0	1	61	3.86		0.98	77.4	0.29338
0.163			43	0	0	10	0	0	33	12	0	2	57	4.69		0.97	70	0.24854
0.2065			71	0	0	10	0	1	5	12	0	1	29	6.93		1.45	93.01	0.225445
0.215			33	0	0	26	0	0	35	2	0	4	67	1.74		0.58	90	0.21308
0.181			34	0	0	15	0	1	32	17	0	1	66	1.77		0.75	88	0.18506
0.183			48	0	0	14	0	0	25	12	0	1	52	3.78		1.18	89	0.14599
0.189			40	0	0	12	0	1	21	24	0	2	60	2.1		0.9	78	0.14893
0.207			48	0	0	15	0	0	16	18	0	3	52	4.24		2.19	58	0.16446
0.204			53	0	0	37	0	0	2	7	0	1	47	3.03		2.31	52	0.28831
20.841	12.25		25	0	0	32	1	12	19	10	0	1	75	0.8884		2.24	55.76	0.56031
17.822	16.8		28	0	0	31	3	17	17	2	0	2	72	1.064		1.52	84.03	0.67276
11.915	15.39		27	0	0	34	2	18	17	0	0	2	73	1.031		1.63	71.97	0.82063
8.835	20.88	3.58	36	0	0	40	0	7	13	0	0	4	64	2.487		6.85	44.94	1.12935
5.458	25.62	3.67	42	0	0	31	1	10	14	0	0	2	58	2.117		5.7	47.13	1.37001
5.303	27.52	3.65	43	0	0	28	0	8	11	0	0	10	57	1.803		0.67	67	1.33639
4.589	24.36	3.7	42	0	0	35	0	8	12	0	0	3	58	2.248		5.91	75	1.35793
4.653	23.37	3.69	41	0	0	36	0	7	14	0	0	2	59	2.2		5.73	48.66	1.56375
3.589	21.66		38	0	0	40	0	7	12	0	0	3	62	2.214		6.19	47.74	1.70499
3.898	23.56		38	0	0	39	0	8	11	0	0	4	62	2.663		7.53	44.28	1.76339
3.641	21.83	3.72	37	0	0	38	1	6	13	0	0	5	63	2.81		7.36	48.76	1.81993
3.191	23.18		38	0	0	35	0	8	15	0	0	4	62	2.619		6.23	43.23	1.83008
3.379	19.8		36	0	0	32	1	4	22	0	0	5	64	3.189		7.52	40.14	1.83542
3.038	16.52		28	0	0	44	0	4	19	0	0	5	72	3.669		7.2	44.31	1.81286
2.021	15.93	3.77	27	0	0	45	0	4	20	0	0	4	73	3.316		6.29	42.01	1.81995
1.882	15.66		29	0	0	45	0	4	19	0	0	3	71	3.622		6.83	43.19	1.96737
2.34	14.03		23	0	0	32	0	3	13	0	0	29	77	3.099		5.85	40.64	2.23195
2.073	20.13		33	0	0	41	0	5	16	0	0	5	67	3.327		6.65	53.21	2.90116
2.29	15		25	0	0	48	0	6	17	0	0	4	75	3.857		6.91	49.31	3.52257
2.5245	14.95		23	0	0	51	0	4	19	0	0	3	77	3.632		6.68	50.88	3.61335
2.361	14.75		25	0	0	51	0	3	18	0	0	3	75	3.663		6.7	49.49	3.5366
2.257	12.32		22	0	0	55	0	3	17	0	0	3	78	3.483		6.66	49.09	3.54491
2.148	12.6		20	0	0	55	0	4	18	0	0	3	80	3.452		5.86	45.49	3.71602
2.47	12.2		20	0	0	50	0	4	22	0	0	4	80	3.618		6.83	49.39	4.06863
1.832	13.57		23	0	0	47	0	5	16	0	0	9	77	3.501		6.61	51.09	4.16176
1.912	13.57		23	0	0	52	0	2	19	0	0	4	77	3.803		6.95	48.29	4.0621
1.823	12.6		20	0	0	53	0	4	19	0	0	4	80	3.778		6.82	47.04	3.62838
1.641	14.72		23	0	0	47	0	4	22	0	0	4	77	3.442		7.48	45.2	2.47811
1.8035	13.44		24	0	0	50	0	4	19	0	0	3	76	3.989		7.22	48.12	1.38838
1.628	13.68		24	0	0	51	0	3	18	0	0	4	76	4.01		7.37	47.58	2.35377
1.494	14.75		25	0	0	50	1	4	17	0	0	3	75	4.221		7.35	46.1	3.59709
1.458	13.42		22	0	0	53	0	4	17	0	0	4	78	4.252		7.33	47.91	4.64937
1.727	14.26		23	0	0	52	0	3	18	0	0	4	77	4.103		7.38	41.72	4.74214
1.479	13.8		23	0	0	52	0	3	17	1	0	4	77	4.624		7.94	50.1	4.82544
1.539	12.6		21	0	0	51	0	3	19	2	0	4	79	4.773		7.88	49.18	4.81276
1.542	12.81		21	0	0	48	0	3	20	4	0	4	79	4.9		8.02	51.07	4.89984
1.447	11.8		20	0	0	49	0	4	21	2	0	4	80	4.949		7.33	51.38	5.31342
1.386	10.71		17	0	0	52	0	3	20	4	0	4	83	4.636		7.75	49.16	5.47382
1.811	12.07		17	0	0	53	0	3	16	7	0	4	83	3.796		7.41	52.84	4.24244
1.801	10.2		17	0	0	63	0	3	11	4	0	2	83	3.963		6.24	45.53	3.44377
1.825	13.65		21	0	0	55	0	2	12	7	0	3	79	4.556		6.54	49.82	3.49295
1.805	9.75		15	0	0	55	0	4	15	7	0	4	85	4.301		6.85	49.92	3.53175
1.56	10.72		16	0	0	49	0	3	20	9	0	3	84	4.426		7.56	46.8	3.54009
1.833	8.58		13	0	0	67	0	2	10	5	0	3	87	4.345		7.26	51.54	3.54919
1.546	10.37		17	0	0	33	2	2	30	10	0	6	83	3.769		6.19	45.15	3.68517
1.837	13.6		20	0	0	44	0	3	23	7	0	3	80	4.929		9.71	44.89	3.80312
2.202	14.7		21	0	0	20	0	10	33	12	0	4	79	2.62		6.33	44.8	3.64997
1.38	40.7		55	0	0	16	0	5	10	5	0	9	45	4.235		7.74	45.12	0
11.161	15	3.52	34	0	0	40	3	8	11	2	0	2	66	0.74		2.5	56.77	3.78543
10.155	16		30	0	0	59	2	0	7	0	0	2	70	1.02		2.78	58.79	3.56201
19.314	15.81		25.5	0	0	53.5	5	7	8	0	0	1	74.5	0.95		3.02	49.19	3.42587
18.553	14.82		26	0	0	49	4	10	7	3	0	1	74	0.99		2.81	54.38	3.45939
11.825	16.92		33	0	0	48	2	7	8	0	0	2	67	1.16		3.1	58.58	3.88585
13.957	17.36	3.48	28	0	0	54	2	7	7	0	0	2	72	1.24		3.39	45.24	5.32933
16.08	15.86		26	0	0	52	1	11	7	0	0	3	74	1.43		3.89	43.89	6.05108
16.685	17.55		27	0	0	49	2	11	7	3	0	1	73	1.03		2.9	56.21	5.64371
19.631	15.5		25	0	0	50	3	8	12	0	0	2	75	1.21		3.36	57.73	4.97555
21.633	15.602		26.9	0	0	44.1	2	11	11	2	0	3	73.1	1.04		2.82	56.82	4.49601
19.203	13.86		23.1	0	0	49.9	3	12	10	0	0	2	76.9	1.13		3.11	51.18	4.25863
14.844	17.55	3.2	27	0	0	48	3	10	9	1	0	2	73	1.17		3.34	43.26	4.29235
18.387	16.52		28	0	0	46	3	11	9	1	0	2	72	1.06		3.16	53.91	4.23337
16.442	14.16		24	0	0	56	0	7	9	2	0	2	76	1.16		3.05	50.29	4.16838
21.278	13.42		22	0	0	52	2	8	12	2	0	2	78	1.23		2.95	47.33	4.03841
23.562	13.845		21.3	0	0	48.7	3	13	11	2	0	1	78.7	1.14		2.6	54.3	3.66984
19.658	15.5		34	0	0	40	3	10	11	0	0	2	66	1.02		2.32	46.71	3.44135
28.067	16.368		24.8	0	0	43.2	4	13	11	3	0	1	75.2	0.93		2.33	53.42	3.57889
33.787	12.4		20	0	0	42	4	16	11	6	0	1	80	1.01		1.79	42.82	3.78043
10.524	17		37	0	0	35	4	13	7	2	0	2	63	1.21		2.43	11.28	4.12415
17.964	18.76		28	0	0	47	3	10	9	2	0	1	72	1.38		2.92	46.32	4.00582
35.827	13.6		20	0	0	39	5	16	11	7	0	2	80	1.01		2.2	53.25	2.92299
68.694	2		8	0	0	42	4	9	14	20	0	3	92	0.5		0.84	30.74	1.84016
27.903	17.94		26	0	0	38	5	20	8	2	0	1	74	0.91		2.07	44.19	2.41524
32.812	14.26		23	0	0	38	5	17	11	4	0	2	77	1.01		2.49	41.48	2.84925
29.7	14.945		24.5	0	0	40.5	4	15	10	5	0	1	75.5	0.98		2.54	43.27	2.92151
27.2826	15.25		25	0	0	31	7	18	13	5	0	1	75	0.91		2.61	42.57	2.98988
19.85	14.8	3.3	33	0	0	35	4	19	5	2	0	2	67	1.38		3.53	35.09	3.12313
18.985	15.3		30	0	0	36	0	15	13	4	0	2	70	1.55		3.44	39.34	3.20665
30.519	12.33		24	0	0	38	5	17	12	3	0	1	76	1.1		2.41	36.69	2.37667
149.697	1.05		3	0	0	42	2	8	9	35	0	1	97	0.53		1.08	31.29	1.9007
35.95	11.7		18	0	0	41	6	21	9	3	0	2	82	1.04		2.16	37.74	2.85854
26.725	17.08		28	0	0	31	5	18	12	4	0	2	72	1.12		2.61	39.97	3.70846
26.002	16.52		28	0	0	29	3	23	12	3	0	2	72	1.14		2.8	33.13	4.03471
29.5485	15.9		30	0	0	32	4	18	13	1	0	2	70	1.36		3.13	33.84	4.31927
31.944	12.24		24	0	0	35	6	16	13	3	0	3	76	1.23		2.75	34.35	4.24572
28.422	14.03		23		0	43	5	11	14	2	0	2	77	1.22		3.02	39.44	4.23893
33.693	8.61		21	0	0	42	7	20	8	1	0	1	79	0.25		0.75	42.07	4.34289
27.021	17.4		30	0	0	35	5	11	14	2	0	3	70	1.28		2.76	39.9	4.52543
16.5075	18.91		31	0	0	35	5	12	11	3	0	3	69	1.82		3.67	30	5.44586
6.318	25.35		39	0	0	37	2	9	7	2	0	4	61	2.54		4.48	33.11	6.38092
4.564	28.12	3.63	38	0	0	37	2	7	7	4	0	5	62	3.39		4.51	37.14	7.34857
4.6	29.97		37	0	0	30	3	7	14	5	0	4	63	5		7.26	31.67	8.45977
5.025	28		35	0	0	40	0	9	4	6	0	6	65	6.23		6.76	21.66	8.70937
4.54	24.94		29	0	0	30	3	6	12	13	0	7	71	5.24		6.83	28.39	8.94685
3.866	23.49		27	0	0	33	2	4	16	13	0	5	73	5.24		6.45	27.83	8.68495
4.039	22.1		26	0	0	29	1	4	17	18	0	5	74	4.19		5.88	29.09	8.16115
9.141	17.86		19	0	0	56	1	5	9	6	0	4	81	3.97		5.01	24.6	7.43902
10.945	19.55	3.42	23	0	0	39	0	7	16	11	0	4	77	3.71		4.94	28.91	7.17752
12.901	12.74		14	0	0	40	0	5	14	24	0	3	86	3.57		4.33	27.42	6.89739
12.479	13.5		15	0	0	55	0	4	13	10	0	3	85	3.78		4.93	27.26	7.08653
9.2	12.22		13	0	0	45	0	4	13	21	0	4	87	3.62		4.75	30.75	7.15282
12.3	13.3	3.44	14	0	0	39	3	4	17	20	0	3	86	3.6		5.24	29.4	6.99684
12.5685	15.2		16	0	0	43	2	4	16	16	0	3	84	3.52		4.72	29.8	6.84085
11.712	10.68		12	0	0	37	1	3	14	31	0	2	88	2.87		4.8	26.68	6.97134
12	13.16		14	0	0	48	1	3	15	17	0	2	86	3.36		3.65	25.64	6.93796
13	16.92		18	0	0	35	0	3	23	19	0	2	82	3.09		4.73	22.82	6.70241
11.707	13.76		16	0	0	48	3	6	14	10	0	3	84	5.02		4.46	25.49	6.53434
11.582	8.76		12	0	0	44	0	3	28	10	0	3	88	3.29		4.97	26.29	7.6566
10.563	10.34		11	0	0	47	1	3	22	14	0	2	89	3.64		3.59	26.67	8.06179
10.259	11.34	3.46	14	0	0	64	0	5	6	8	0	3	86	6.85		7.89	17.68	6.73999
6.8955	16.8		21	0	0	24	3	11	27	10	0	4	79	4		4.42	25.42	6.35051
5.4985	14.25		15	0	0	12	0	2	28	39	0	4	85	5.16		6.32	15.94	7.4584
4.373	19.88		28	0	0	22	0	7	24	15	0	4	72	4.48		3.28	27.16	8.44035
4.08	22.4		35	0	0	35	2	7	8	11	0	2	65	3.22		4.6	37.44	5.56035
18.621	28		30.2			42.5	2.2	9.6	8.9	5.5		1.1	69.8	3		3.80071	49.3252	2.00954
13.448	28	2.93	30.1			42.3	2.1	11.7	7.6	4.7		1.5	69.9	2		3.53557	52.7183	1.98398
23.014	13		33.5			48.7	0	6.7	7.3	2.6		1.2	66.5	1.39		3.90304	30	1.96012
22.547	12		34			38.2	0	11.3	7	6		3.5	66	1.31		3.96114	38	1.97661
18.507	20		31.2			41.5	1	9.9	8.1	6.7		1.6	68.8	1.62		4.36981	38	2.02611
7.804	38		42.5			40.3	0	6.5	7.2	0.6		2.9	57.5	2.274		5.49928	50.2587	2.07112
20.38	28		30.6			39.1	2.8	10.2	11.9	4.1		1.3	69.4	1.432		3.62767	35	2.12706
18.417	18		42.5			41	0	6.9	5.3	1.4		2.9	57.5	1.407		4.19877	46.9886	2.17011
18.436	24		31.5			40.3	0	10.5	12.2	4.2		1.3	68.5	1.557		5.21723	51.6042	2.28025
11.65	18		37			36.3	0	4.6	10.5	7.2		4.4	63	1.533		3.68608	48.9134	2.35433
14.942	28		30.3			45.2	1.6	8.7	7.9	4.5		1.8	69.7	1.634		4.41425	50.484	2.69984
17.473	13	2.99	33			41.3	0	9.8	9.7	3.8		2.4	67	1.772		4.28061	51.3623	3.25459
10.87	34		37.5			41.8	0	8.9	6.8	3.1		1.9	62.5	2.043		4.87642	47.2259	3.76666
9.259	32		32.8			48.9	0	5.2	6.7	3.3		3.1	67.2	2.881		6.126	45.8083	3.86132
7.373	36		41.3			41.7	0	6.4	5.3	1.8		3.5	58.7	3.209		7.03364	43.8464	3.62375
6.806	32		38			45.2	0	6	5.8	1.9		3.1	62	3.144		7.26153	47.5709	3.4855
5.3	28		29.4			24.8	0	4.6	36	2		3.2	70.6	3.566		7.84413	46.3681	3.07587
22.087	14		35.4			45.8	0	5	7.5	2.1		4.2	64.6	4.294		8.25788	39.5536	3.624
8.331	22		26.6			49.5	0	4.3	8.2	6.1		5.3	73.4	4.78		7.31556	34.2181	5.3643
5.381	21		25.9			56.2	0	4.7	6.3	3.5		3.4	74.1	4.904		7.39439	27.054	5.9544
8.92	18		22.6			58.3	0	3.7	7.5	3.2		4.7	77.4	4.103		6.67287	26.7132	5.91756
5.049	22	3.07	23.1			53.6	0	3.9	9.5	4.5		5.4	76.9	3.944		7.12114	31.6475	5.83334
25.619	18		20			59.7	0	3.9	8.2	3.2		5	80	4.748		6.91965	21.6092	5.73542
18.513	14		15.6			66	0	2.4	8.7	4.9		2.4	84.4	4.275		6.09577	18.9272	5.58549
17.163	19	5.45	21.4			63.2	0	3.1	4.6	4.9		2.8	78.6	5.497		7.66069	17.4302	5.39592
15.892	16		16.7			62.3	0	3.1	8.3	7.1		2.5	83.3	4.561		6.56271	35	5.3294
54.444	9		10.6			69.2	0	3.1	7	7		3.1	89.4	3.899		5.71537	18.1515	5.12983
35.935	10		12			48.9	0	12.1	5.9	3.6		17.5	88	4.036		3.94219	18.4495	4.91386
33.399	14		15.1			57.2	0	3.1	12.7	8.8		3.1	84.9	3.912		6.47299	16.4812	4.77832
38.307	11		12.8			55.8	0	2.8	19	7		2.6	87.2	3.957		5.71704	16.7731	4.47275
50.554	13		14.7			50.7	0	2.6	22.7	5.9		3.4	85.3	3.657		5.28012	16.3693	4.60048
43.295	12	3.16	13.6			57	0	2.3	16.5	7.4		3.2	86.4	4.954		7.28844	13.1975	4.6239
31.284	22		26.2			42.3	0	6.6	18.6	3.8		2.5	73.8	3.542		5.9039	31.8828	5.32765
21.392	6		8.9			30	0	1.5	42.8	15.4		1.4	91.1	3.771		4.19807	32	5.94906
24.691	18		21			47.2	0	1.5	22.3	6.5		1.5	79	4.159		5.67167	26.5286	6.34993
16.808	22		30			39	0	1.6	16.3	11.3		1.8	70	3		4.53363	27.0891	6.25183
11.1585	11		12.3			58.8	0	1.9	17.3	9		0.7	87.7	4		4.43445	34.7927	6.15373
47.298	12		15.8			59.6	0	2.9	11.6	7		3.1	84.2	3.236		5.52444	26	5.68851
35.047	12		14			57.8	0	1.1	16.4	9.1		1.6	86	2.938		4.4595	28	4.72907
9.719	11		12.4			80.2	0	1.6	2.7	2.3		0.8	87.6	3.905		4.91715	38.7482	4.09711
13.974	23		33.5			27	0	3.9	20.7	13.7		1.2	66.5	0.8671		3.48911	40	0
13.194	24.8998	3.2	34.6149			38.2812	0	3.61983	3.9892	17.5781	0.484799	1.43202	65.3851	1.04247		4.44	47.9597	3.12306
5.139	26.2109		39.6548			34.9271	0	5.01656	3.64105	15.5056	0	1.25476	60.3452	1.35882		4.44	46.1063	3.13484
12.931	25		47.0871			39.9122	0	4.30074	2.89043	3.21106	0	2.59849	52.9129	0.834286		5.04	46.9556	3.06572
15.652	30.836		40.9407			38.2074	0	3.92991	4.09031	10.7587	0	2.07292	59.0593	2		5.04	48.3406	3.02374
13.484	31.5825	3.3	43.9035			42.7135	0	4.61305	3.95405	2.92335	0	1.89253	56.0965	1.33472		4.36	49.7178	2.96076
10.494	35.8315		46.4018			41.7126	0	4.99658	2.6385	2.07626	0	2.17434	53.5982	1.42539		4.36	50.1313	2.92927
6.642	30.9847		42.936			44.1245	0	4.49835	2.65082	4.23324	0	1.55712	57.064	1.65		4.46	50.5448	2.89639
4.656	30.4229		42.2419			39.7346	0	3.58251	3.39973	9.3406	0	1.70071	57.7581	1.62753		4.46	50.5448	2.86246
4.234	32.8919		44.267			43.1489	0	4.99295	2.73423	2.91097	0	1.94597	55.733	1.52475		4.46	50.9396	2.82852
13.505	30.9312		41.6874			45.096	0	4.32922	3.01499	4.07407	0	1.79829	58.3126	1.37273		4.64	51.1928	2.74369
7.652	35.1502		46.4456			40.8735	0	5.85651	2.47071	2.63042	0	1.72316	53.5544	1.69966		4.64	51.446	2.69279
12.891		3.4	47.1064			41.0423	0	4.80495	2.13847	2.65614	0	2.25179	52.8936	1.8626		4.64	50.7267	2.62492
12.092	32.8649		42.6184			44.1643	0	5.19972	2.82842	2.18999	0.562469	2.43679	57.3816	1.46589		4.68	49.8908	2.5587
5.625	29.8081		40.241			41.5541	0	5.86646	3.9868	6.30939	0	2.0423	59.759	1.8173		4.54	48.0165	2.48869
3.446	31.8965		44.5986			38.66	0	6.67634	3.52158	3.98354	0	2.55992	55.4014	1.33211		4.54	60	2.43868
3.506	30.7158		40.2992			40.0883	0	5.97927	4.30973	7.3165	0	2.00703	59.7008	1.51475		4.54	50.8558	2.49727
4.763	28.9184		37.8931			42.0226	0	5.37412	3.45479	9.07266	0	2.18272	62.1069	1.34514		3.57	53.3007	2.59948
12.136	26.9623		36.1612			43.0996	0	8.34499	5.11512	4.91446	0	2.36466	63.8388	1.47836		3.57	53.5649	2.83798
11.528	28.536		38.0032			41.0213	0	6.12041	3.82214	9.09585	0	1.93701	61.9968	1.65034		4.5	50.1524	3.00834
12.716	24.9453		33.3423			41.9673	0	5.16031	4.66885	12.4266	0	2.43461	66.6577	1.52474		4.5	48.2368	3.16702
15.028	30.7932		41.4309			46.0828	0	4.47908	3.1009	2.71181	0	2.19448	58.5691	1.6717		5.17	46.8048	3.17125
13.756	26.6124		35.415			50.5335	0	5.44673	3.26804	3.7278	0	1.60888	64.585	2.27481		5.17	46.3275	3.17407
10.639	29.5775		40.333			48.5675	0	3.53218	2.91946	2.87793	0	1.76997	59.667	2.00164		5.17	46.1773	3.17971
9.712	28.8268	3.6	38.4762			45.8773	0	6.60633	2.71331	4.39585	0	1.93108	61.5238	2.08214		4.21	47.127	3.18394
10.135	29.7571		40.9635			44.0361	0	5.2191	2.51635	5.61315	0	1.65176	59.0365	1.80918		4.21	47.1019	3.19099
10.6645	25.43		35.0231			40.6704	0	6.51841	3.65318	12.4687	0	1.66624	64.9769	1.49422		4.21	45.7037	2.99463
12.335	32.153		43.0544			38.3116	0	7.2637	2.73338	6.18388	0	2.45303	56.9456	1.16579		5.11	43.8394	2.23403
14.178	33.5667		47.385			35.868	0	9.5648	2.12027	2.59593	0	2.46604	52.615	1.60423		5.11	42.9073	1.92979
12.41	23.1764		32.1158			31.4454	1.60555	7.81286	2.8853	22.7541	0	1.381	67.8842	1.52684		5.11	41.9899	2.0194
9.822	26.054		35			45.9443	1.11435	6.70821	1.86483	6.82471	0	2.51035	64.9668	1.54922		4.57	41.0977	2.13681
9.789	14.4099		27.8057			40.2512	1.65776	13.688	7.38344	7.64534	0	1.5685	72.1943	0.902326		4.57	39.7443	2.25423
12.71	31.4329		42.5027			37.9425	0	7.13834	3.22466	6.73414	0	2.45761	57.4973	1.51951		4.95	38.8187	2.29863
14.688	30.1036		40.7992			33.3334	0	9.78827	4.35632	9.53347	0	2.18933	59.2008	1.70713		4.95	40.6956	2.26029
16.679	25.6391		35.2864			35.275	0	11.3102	3.74234	12.6357	0	1.75026	64.7136	1.855		5.3	42.6521	2.20276
18.161	26.7444		37.5829			35.6023	0	14.3163	3.19694	7.63229	0	1.66927	62.4171	1.75		5.3	42.4895	2.16442
18.729	29.5036		40.8329			33.1545	1.55837	10.3531	3.61301	8.60413	0	1.88403	59.1671	1.90826		4.81	39.0595	2.08772
18.574	23.2815	3.2	32.162			38.9285	2.32017	12.0796	5.33877	6.97564	0	2.19524	67.838	1.88571		4.81	35.6294	2.01103
12.217	23.2822		31.8824			38.6255	1.67044	10.5499	6.33738	9.11439	0	1.81996	68.1176	2.09898		4.81	36.0252	1.93434
8.983	22.5604		31.2837			36.7008	1.73473	10.3723	6.77372	11.4934	0	1.64133	68.7163	1.59717		4.06	36.9164	1.85764
9.221	23.2797		32.3075			39.9833	1.76764	10.9045	7.3336	6.77427	0	0.929144	67.6925	1.59717		4.06	37.8267	1.86766
9.483	23.4517		32.1045			43.9275	1.94007	11.5211	4.86998	3.88858	0	1.7482	67.8955	1.79739		4.06	40.2832	1.89
13.774	22.2916		31.3733			36.3169	2.14448	11.4484	7.35968	10.3427	0	1.0145	68.6267	1.78947		2.93	43.7223	1.9235
24.744	25.6971		34.4611			35.2717	1.91929	7.94856	7.4092	9.24814	0	3.74194	65.5389	2.08622		2.93	35	1.96817
28.223	19.5765		26			39.415	2.67845	13.3639	6.44331	10.5382	0	1.60903	74.0479	2.47126		2.93	35	2.01284
26.555	23.0226		31.2			40.2228	1.75558	11.6329	5.95929	7.46411	0	1.81206	68.8468	1.505		4.42	42.0989	2.05289
23.903	20.65		28			51.1868	1.19382	8.15775	5.13501	4.65271	0	1.6943	72.0204	1.94419		3.69	42.9989	2.05535
22.821	4		4.04438			19.9476	0	3.81188	54.6856	17.0882	0	0.422239	95.9556	1.16076		3.69	43.5842	2.06026
18.955	24.0502	3.3	34.4543			34.7469	0.963457	8.96104	6.23093	12.5164	0	2.12702	65.5457	0.700729		4.4	42.7016	2.06764
19.085	21.9619		34.224			44.1563	2.361	10.2812	3.45718	3.68065	0	1.83966	65.776	1.8975		4.4	42.2603	2.0701
19.255	28.2261		38.2108			43.1684	1.10745	9.18923	3.93824	2.58967	0	1.79627	61.7892	1.99831		4.4	41.819	2.07256
18.7	25.2481		34.7947			41.3285	1.46785	6.8726	6.68685	6.48345	0	2.36612	65.2053	2.56101		4.4	43.1074	2.07502
18.251	21.9992		31.4274			38.2523	2.32265	11.5146	7.10215	6.70926	0	2.67158	68.5726	2.0584		3.36	44.5615	2.07871
14.037	23.1921		31.4817			37.616	2.30354	11.8828	8.03576	6.97089	0	1.70941	68.5183	2.28136		3.36	45.8065	2.08486
10.161	20.9714		28.4611			40.3365	2.22956	11.5852	7.85571	8.03764	0	1.49423	71.5389	1.34211		3.75	43.8592	2.10054
9.1575	22.6182		31.0676			40.233	1.98823	10.8366	6.5505	7.08461	0	2.23949	68.9324	1.674		3.75	42.4081	2.11676
16.038	24.7443	2.3	34.6989			38.2607	1.25247	11.5897	6.07502	6.34567	0	1.77754	65.3011	1.52826		4.23	40.5051	2.14378
24.459	23.9609		32.1728			39.786	0.984718	12.817	6.2826	6.35975	0	1.59719	67.8272	1.84258		4.23	38.6021	2.1654
21.427	20.8208		27.9593			41.9591	1.49024	12.8235	7.6375	5.93705	0	2.19333	72.0407	1.95867		4.23	42.319	2.19784
17.439	23.644		32.2831			43.7643	1.80834	8.79967	5.65693	5.51003	0	2.17759	67.7169	1.94615		2.74	44.2797	2.20865
15.8175	25.0638		35.456			37.786	1.70077	10.7415	6.33924	6.0259	0	1.95054	64.544	2.15833		2.74	46.2404	2.21946
15.259	24.7647		34.0262			46.1265	0.857676	7.48878	5.44216	4.34545	0	1.71315	65.9738	2.19706		2.74	47.7109	2.22693
17.43	22.9123	2.6	32.3			38.5846	1.97265	5.13514	2.26955	0	0	19.7308	67.6927	1.81103		2.74	46.7727	2.2406
14.204	19.7512		34.5292			40.338	2.03037	9.24947	6.34249	5.8029	0	1.70759	65.4708	0.918		3.77	42.8315	2.24744
16.865	17.9978		27.6701			52.111	1.02905	9.20836	4.52047	2.86468	0	2.59637	72.3299	1.92174		3.77	40.5946	2.25769
17.599	25.1204		36.1106			44.7721	0.94349	8.28923	4.34198	4.09734	0	1.4453	63.8894	1.93375		3.77	40.3286	2.49177
18.9245	20.5856		31.6038			46.6852	0	4.51186	1.77252	1.54398	0	13.8826	68.3962	1.504		4.14	40.0626	2.61493
19.764	19.0209		29.3656			56.4169	0	6.09302	1.95847	3.82262	0	2.34347	70.6344	2.13429		4.14	40.0626	2.73809
7.748	13.9438	3.8	21.0125			64.8149	0.830308	4.88575	2.02635	4.42252	0	2.00764	78.9875	3.10143		4.14	39.7435	3.03155
6.257	18		24.9866			62.6782	0	3.44491	1.89822	4.26637	0	2.72564	75.0134	2.5471		3.81	39.7479	3.04327
6.9355	24		31.875			51.5421	0.886657	6.56372	2.70483	4.37709	0	2.05068	68.125	2		3.81	39.9119	3.07844
6.357	20.647		30.8271			54.0262	1.15292	5.74456	1.79371	3.81931	0	2.63619	69.1729	3.0156		3.81	40.5385	3.10774
7.399	32.3095		50.0028			33.0543	0	6.14811	1.65744	2.9862	0	6.15116	49.9972	3.0625		5.22	40.8518	3.13118
12.498	17.3845		37.8323			47.4927	0	5.50109	1.83894	3.3132	0	4.02172	62.1677	2.58182		5.22	41.1652	3.16049
14.442	21.2471		29.5505			49.2356	1.56414	7.12555	1.90863	3.92853	0	6.68705	70.4495	2.38		5.22	41.4785	3.31506
11.012	22.4087		30.6645			56.2804	0	4.64664	2.47211	2.74156	0	3.19472	69.3355	3.44545		5.22	41.7918	3.47912
6.47	15.377		21.5817			60.2725	1.27013	3.05381	3.823	7.1502	0	2.84857	78.4183	2.89714		4.59	36.5445	3.92458
6.822	17.2933		21.9392			64.6669	1.22769	3.91497	2.337	4.21056	0	1.70366	78.0608	3.44889		4.01	33.6292	4.04105
23.379	13.4561		18.4104			70.801	1.34294	2.44713	2.45805	2.93097	0	1.60946	81.5896	3.3125		4.01	32.2701	4.15751
7.814	28.2453		34.8913			50.1273	0.93758	4.98307	1.94492	4.75029	0	2.36559	65.1087	3.39857		5.41	30.9664	4.29727
5.834	14.9434		18.7077			68.9167	0	3.11795	2.67253	4.77601	0	1.8091	81.2923	2.45569		4.58	29.0489	4.4053
5.4675	9.52451		12.166			65.8991	0	1.75731	4.69259	14.0626	0	1.42248	87.834	3.162		4.58	28.0901	4.5098
8.682	31.6643		40.3			48.0069	0	10.6658	0	0	0	1.03863	59.7113	3.69687		4.58	27.9137	4.68397
17.494	8.82954	2.8	15.1906			66.616	1.02655	2.63054	5.07318	7.60156	0	1.86161	84.8094	0.731613		4.39	30.3278	4.82331
22.1	11.9602		19.554			62.7184	0	2.58476	5.66909	7.28427	0	2.18944	80.446	3.34645		4.39	27.9666	4.99747
21.469	10.6729		17.1687			64.5151	0	2.54351	6.13168	7.61602	0	2.02503	82.8313	2.456		4.6	26.0142	5.04568
20.814	9.21626		14.7915			67.4966	0.829715	2.56487	3.99194	9.0543	0	1.27101	85.2085	3.24857		4.6	24.0726	5.06049
9.706	12.0011		18.4611			64.1009	0.562837	2.72429	5.76908	6.25167	0	2.13012	81.5389	3.92889		5.09	35	5.07899
6.27	12.8583		19.1038			63.3846	0	3.18397	5.57195	5.32679	0	3.42889	80.8962	3.39229		5.09	40	5.0975
5.79	9.8737		14.2462			67.2229	0	2.28304	5.4793	9.16689	0	1.60164	85.7538	3.10854		5.09	42	5.10861
10.385	9.72243		13.8284			66.021	0	2.72087	6.89362	8.76324	0	1.77287	86.1716	3.07535		4.26	35	5.07145
14.1945	12.6929		17.7243			54.4689	0	3.73501	8.84033	12.3166	0	2.91487	82.2757	4.52432		4.29	27.0673	4.96248
21.084	6.52101		7.45258			62.1049	0	1.62656	8.4602	19.1274	0	1.22845	92.5474	3.32952		4.29	28.9666	4.8535
29.771	9.68407		12.4891			67.2471	0	2.11169	7.17542	9.80712	0	1.16955	87.5109	2.42786		5.07	29.6992	4.74453
30.3295	20.0571		24			55.7132	0	3.41748	2.04002	4.67791	0	10.1398	75.9884	2.71047		5.07	26.7767	4.71108
34.088	8.84032		13.3843			63.3199	0	2.16875	8.76353	10.3902	0	1.97333	86.6157	1.85769		4.57	24.8284	4.75481
34.811	8.75704		12.4545			53.2724	0	1.95541	9.28282	21.6187	0	1.41623	87.5455	2.57073		4.57	23.4777	4.82769
16.52	14.6772		18.3465			29.2521	0	2.66999	6.66375	40.6321	0	2.43561	81.6535	3.53556		4.22	36	4.87142
9.305	16.886		20.8159			56.1293	0	2.87766	9.94333	8.73965	0	1.49417	79.1841	3.62824		4.22	25.0207	4.97345
8.073	15.6773		19.6643			52.0794	0	2.08853	11.3607	14.1842	0	0.622852	80.3357	2.68946		4.34	29.6083	4.91177
8.86	13.5738		17.1934			71.76	0.635382	2.02616	0.744305	6.43838	0	1.20234	82.8066	3.4504		4.34	27.6457	4.89091
14.576	12.1351		15.0879			63.49	0	2.39491	4.04141	14.2397	0	0.746106	84.9121	1.452		5.01	38	4.82834
21.534	26.9446		34.3641			42.7642	0	3.65307	5.70327	12.2629	0	1.25248	65.6359	3.0576		3.92	30.8707	4.75472
8.736	23.3668		29.9726			54.1971	0	2.15134	7.23416	5.43654	0	1.0082	70.0274	2.68938		3.92	39.3121	4.19963
8.2	27.5188		35.4075			39.3801	0	4.16434	4.65578	15.4898	0	0.902505	64.5925	1.785		3.76	34.7862	3.08944
20.85	22.5283		29.6623			35.4024	0	3.41817	8.47566	21.5005	0.549348	0.991644	70.3377	1.00724		3.1	42.6553	2.49341
23.198	22.1918		30			41.2646	0.80638	4.95924	13.6969	8.54824	0	0.813823	70.0892	0.33561		3.1	46.0827	2.18613
20.759	20		39.2577			29.7923	0.667893	5.13442	12.5916	11.7135	0	0.842572	60.7423	0.47027		2.58	38	1.51012
19.369	22.5331		30			49.0346	1.01431	5.19833	10.3967	3.16248	0	1.27959	70.086	0.418421		1.87	45	1.33587
19.836	30.1638		38.8509			37.1958	0	6.07403	11.8325	6.04674	0	0	61.1491	0.152308		1.87	39	1.23666
29.583	18.8037		25			54.172	0	6.20755	9.26841	5.3449	0	0	74.9928	0.1		1.62	20	0.84937
36.862	14.5836		19			64.5443	0	4.32748	8.57768	3.57881	0	0	81.0283	0.0527273		1.62	14	0.75713
12.315	27.3		42			42	0	7	3	3	0	3	58	1.53		4.77	34.53	2.1036
16.933	28.7		41			43	0	6	1	6	0	3	59	1.71		4.39	36.89	2.26924
16.336	26.52		39			42	0	7	3	5	0	4	61	2.17		4.81	33.07	2.37967
15.81	21		40			45	0	6	2	3	0	4	60	1.82		4	35.71	2.4471
10.043	32		37			41	0	9	2	8	0	3	63	1.87		4.2	33.87	2.48584
9.337	32		38			44	0	6	1	8	0	3	62	2.28		5.05	32.07	2.45866
14.828	25		39			35	0	8	2	13	0	3	61	2.02		4.71	33.8	2.42107
7.219	34		39			36	0	7	5	9	0	4	61	2.46		4.7	34.26	2.31805
10.232	32		38			28	0	6	9	16	0	3	62	2.24		4.49	34.43	2.2776
11.766	31		44			26	0	6	8	13	0	3	56	1.85		4.5	36.96	2.46976
7.982	35		47			32	0	8	4	6	0	3	53	2.07		4.66	36.92	2.70143
10.007	32		40			26	0	7	13	12	0	2	60	2.04		4.63	35.06	2.96365
10.435	38		55			22	0	7	8	5	0	3	45	2.41		5.07	33.61	3.22086
5.442	31		36			35	0	7	5	14	0	3	64	2.65		4.54	31.25	3.08046
10.152	33		39			41	0	7	3	7	0	3	61	2.14		2.91	23	2.95845
27.81	18		26			36	8	6	8	13	0	3	74	2.82		4.17	20	2.80625
18.089	20		38			28	0	5	10	16	0	3	62	2.14		4.53	29.7	2.70347
10.682	32		38			33	0	7	9	11	0	2	62	2.37		4.79	31.69	2.67441
9.739	32		41			31	0	12	3	5	0	8	59	3.29		5.58	30.54	2.7286
13.284	22		37			33	0	6	4	17	0	3	63	2.48		4.63	29.24	2.87784
9.554	27		33			23	0	9	17	17	0	1	67	2.16		4.45	32.72	3.02101
7.3655	29		31			21	0	7	18	11	0	12	69	3.04		5.29	32.92	3.04805
9.149	34		39			28	0	7	13	8	0	5	61	2.53		4.58	31.83	3.06899
11.422	28		36			29	0	7	14	10	0	4	64	1.75		4.57	35.26	3.05638
6.068	33		45			31	0	8	6	6	0	4	55	3.02		5.18	33.33	3.03115
9.401	32		41			29	0	9	11	7	0	3	59	2.7		5.32	32.12	3.11213
10.749	26		29			24	0	6	13	25	0	3	71	2		4.88	33.99	3.19958
6.748	40		60			22	0	10	4	7	0	4	47	2.16		4.66	29.77	2.7418
11.942	29		43			35	0	6	4	8	0	4	57	2.36		5.37	38.56	2.29325
9.7235	33		41			26	0	7	16	8	0	2	59	2.11		5.93	29.33	1.87191
8.124	34		38			34	0	5	8	11	0	4	62	2.58		5.07	35.61	1.95441
13.3654	26		43			33	0	9	5	5	0	5	57	2.65		5.23	32.56	2.07693
10.011	33		42			29	0	6	6	10	0	7	58	2.21		4.69	31.96	2.06588
6.235	42		48			24	0	8	5	6	0	9	52	2.46		4.54	30.9	2.05042
5.48	38		40			29	0	6	8	14	0	3	60	2.24		4.82	33.25	2.07201
10.131	30		46			38	0	6	2	4	0	4	54	2.93		5.47	30.92	2.09853
6.595	40		43			37	0	5	3	7	0	5	57	2.98		5.77	34.85	1.665
4.777	33		39			37	0	7	2	9	0	6	61	0.99		2.23	24.95	1.4326
8.768	37		40			43	0	6	3	4	0	4	60	1.61		3.06	32.95	1.54649
10.763	32		35			41	0	5	7	9	0	3	65	1.47		3.58	30.07	1.65993
8.508	36		38			39	0	5	5	9	0	4	62	2.21		4.32	28.17	1.80713
10.277	32		35			39	0	5	6	12	0	3	65	2.18		4.39	26.53	1.86654
14.346	21		30			50	10	10	0	0	0	0	70	2.16		4.24	27.88	1.81285
13.876	33		43			33	0	10	3	6	0	5	57	2.05		3.76	25.03	1.78657
6.563	32		44			37	0	6	4	4	0	5	56	2.13		3.54	26.67	1.76793
17.237	4		10			16	0	4	64	5	0	1	90	2.29		4.66	29.56	2.03256
5.269	26		27			23	0	8	5	35	0	2	73	2.81		4.53	34.74	2.2887
5.942	33		44			33	0	10	2	6	0	5	56	2.33		4.44	26.46	2.36551
17.717	19		34			36	0	8	5	14	0	3	66	2.44		4.03	24.46	2.43248
16.8	23		37			38	0	11	5	5	0	4	63	2.4		3.96	25.32	2.48468
22.587	18		32			39	0	13	6	6	0	4	68	2.52		4.58	23.1	2.57313
9.117	30	2.7	34			33	0	11	7	13	0	2	66	2.37		4	26.37	2.90816
8.175	25		28			30	0	9	6	25	0	2	72	2.68		4.09	23.04	3.32925
18.707	20		40			28	0	14	5	10	0	3	60	3.14		4.94	21.24	3.79859
6.52	35		40			40	0	9	4	2	0	5	60	3.55		5.32	19.92	4.43551
3.768			35			39	0	10	7	6	0	3	65	4.97		7.06	33	5.36695
6.682			36			33	0	8	6	13	0	4	64	4.23		6.5	15.49	5.6602
6			60			25	0	2	3	8	0	2	40	4.58		5.12	16.84	5.46344
11.438			26			44	0	10	9	7	0	4	74	4.74		5.63	26	5.38661
14.78			34			41	0	9	5	8	0	3	66	3.5		4.68	14.96	5.43797
29.163			32			42	0	9	7	7	0	3	68	4.09		6.21	15.09	5.29431
28.44			33			49	0	7	4	5	0	2	67	4.28		5.39	11.78	4.93628
36.85			20			54	0	4	10	6	0	6	80	3.9		4.49	8	4.61142
29.021			29			53	0	5	3	5	0	5	71	3.75		5.73	10.41	3.87459
49.594			15			52	7	3	9	9	0	5	85	3.47		5.11	4	3.95414
25.603			27			41	0	9	9	9	0	5	73	4.09		6.05	12.05	4.54235
7.584			18			52	0	3	11	12	0	4	82	3.95		5.96	19.74	3.78418
17.457			13			58	0	2	11	14	0	2	87	3.59		1.67	28.99	2.36873
19.698			16			57	0	2	6	17	0	2	84	1.21		1.88	23	1.4229
16.009			23			42	0	6	9	14	0	6	77	1.23		3.94	36.08	0.66024
13.621			15			54	0	2	9	18	0	2	85	0.5		2.7	23	0.5851
22.401			5			60	0	2	8	23	0	2	95	0.18		1.93	18	0.49699
29.6625			22			50	0	9	9	6	0	4	78	0.19		1.96	23	0.37318
11.409	26.65		41			49	0	10	0	0	0	0	59	0.12		2.42	48	1.009
12.397	21.3344		36.16			35	18.9	10	0	0	0	0	63.9	0.6		3.02	40	0.832
12.19	32.24		52			40	0	8	0	0	0	0	48	0.5		2.88	52	1.515
3.892	26.79		47			43	0	10	0	0	0	0	53	0.87		2.32	75.95	1.03
12.109	27.9		45			44	0	9	0	0	0	2	55	0.33		2.36	42	1.071
13.028	30.38		49			35	0	10	2	2	0	2	51	1.22		3.85	53.04	2.198
12.544	29.4		49			26	0	10	4	7	0	4	51	1.55		4.39	51.11	2.996
7.786	27.72		44			40	0	9	3	0	0	4	56	1.55		4.39	47.84	3.641
11.748	24.19		41			35	0	6	6	9	0	3	59	1.51		4.01	50.12	5.106
10.746	27.14		46			31	0	17	3	0	0	3	54	1.58		4.53	50.21	4.868
9.709	26.79		47			31	0	8	6	5	0	3	53	1.58		4.54	49.19	6.23
6.146	23.4		39			29	0	14	9	4	0	5	61	1.92		4.82	49.5	6.121
14.977	25.42		41			44	0	7	4	0	0	4	59	2.5		4.93	48.87	5.954
18.633	28.4		40			22	0	9	12	8	0	9	60	1.72		2.62	40	4.852
11.055	12.42		18			28	0	8	20	20	0	6	82	1.89		2.42	34.84	6.319
10.7375	20.16		32			29	0	10	14	11	0	4	68	2.39		4.4	48.88	4.782
13.3785	18.56		29			37	0	8	11	11	0	4	71	3.14		5.15	53.65	3.994
9.957	32.83		49			32	0	9	4	0	0	6	51	1.48		4.8	45.03	5.032
10.104	28.35		45			28	0	8	6	9	0	4	55	3.24		6.26	50.73	5.595
8.631	15.96		28			29	0	8	4	4	0	27	72	3.33		4	50	5.781
10.107	20.46		33			22	0	8	16	17	0	4	67	2.36		5.49	49.62	5.418
9.129	20.16		32			26	0	8	13	18	0	3	68	2.28		4.52	54.16	4.707
7.836	15.25		25			40	0	10	5	15	0	5	75	2.43		5.33	52.55	5.028
13.344	22.42		38			39	0	11	4	4	0	4	62	3.01		5.82	50.32	4.925
8.219	19.84		31			39	0	8	9	7	0	6	69	2.86		5.57	53.52	6.825
14.102	23.01		39			44	0	5	4	3	0	5	61	2.33		5.19	52.82	6.842
13.022	25.2		42			33	0	7	6	6	0	6	58	2.31		4.59	51.28	5.1
4.1375	17.4		30			44	0	7	10	4	0	5	70	2.36		4.86	52.43	5.399
11.583	27.52		43			42	0	8	3	0	0	4	57	2.46		5.15	49.89	5.235
11.436	21.12		33			51	0	6	4	2	0	4	67	2.45		4.72	50.51	6.39
9.788	21.96		36			42	0	5	6	6	0	5	64	2.08		4.96	51.62	6.278
8.694	22.1		34			43	0	6	7	6	0	4	66	2.02		4.28	52.44	6.651
10.863	18		30			52	0	5	5	3	0	5	70	2.03		4.35	52.84	4.995
9.8245	27.09		43			36	0	6	5	5	0	5	57	1.85		4.49	51.25	5.723
12.969	22.62		39			35	0	11	6	3	0	6	61	1.82		4.35	49.95	3.891
12.983	24.57		39			31	0	9	9	7	0	5	61	1.65		4.07	51.45	5.102
10.3085	24.4		40			43	0	5	5	4	0	3	60	1.89		4.46	48.75	4.176
13.972	17.1		30			47	0	6	8	6	0	3	70	2.07		4.5	47.79	3.783
12.136	20.15		31			48	0	8	6	3	0	4	69	2.58		4.45	46.36	5.279
10.531	21.76		34			47	0	6	5	3	0	5	66	1.92		4.06	49.55	6.287
10.98	20.8		32			44	0	7	5	9	0	3	68	1.79		4.13	49.6	6.431
13.511	18.91		31			43	0	13	4	4	0	5	69	2.28		5.15	45.06	5.043
15.163	23.31		37			33	0	13	5	7	0	5	63	2.39		4.11	44.31	5.032
17.504	18.48		28			41	0	11	8	5	0	7	72	2.46		4.37	43.92	4.551
14.86	17		25			46	0	13	7	6	0	3	75	2.42		4.48	47.82	4.587
10.255	22.1		34			34	0	15	8	5	0	4	66	1.9		3.97	49.46	3.791
10.676	14.52		22			42	0	10	11	12	0	3	78	1.98		3.95	46.05	3.722
15.566	16.64		26			40	0	12	13	6	0	3	74	2.33		3.83	38.58	4.992
5.7445	17.98		29			34	0	14	9	11	0	3	71	2.48		4.3	38.95	5.527
13.287	16.52		28			43	0	10	12	4	0	3	72	2.29		3.88	39.74	2.623
11.33	14.4		24			42	0	12	14	4	0	4	76	2.46		4.09	36.18	4.505
6.082	15.25		25			52	0	11	5	3	0	4	75	3.31		5.15	60	4.774
4.517	41.08		52			28	0	8	4	4	0	4	48	0.72		5.3	65	6.014
9.613	12.73		19			57	0	9	4	5	0	6	81	3.91		5.71	32.18	7.301
12.569	16.25		25			51	0	8	6	5	0	5	75	3.88		5.85	32.86	7.38
7.7225	10.08		14			66	0	5	5	7	0	3	86	3.59		4.61	30.83	7.752
11.26	15.96		21			58	0	6	5	5	0	5	79	5.05		6.03	26.6	8.47
12.4195	9.6		12			49	0	3	12	21	0	3	88	4.56		5.35	32	8.446
19.385	10.01		11			50	0	4	12	19	0	4	89	3.8		5.24	24.87	5.431
18.28	27		30			42	0	4	14	8	0	2	70	3.75		4.37	26.07	7.131
22.7765	2.73		3			68	0	3	21	3	0	2	97	4.05		4.4	25.74	6.687
3.896	34.04		37			43	0	3	5	10	0	2	63	3.38		3.49	70	6.403
8.76	32.55		35			46	0	4	7	6	0	2	65	4.99		6.29	40	7.074
8.669	16.2		20			54	0	4	12	8	0	2	80	5.45		5.25	45	8.83
13	19		25			49	0	3	11	9	0	3	75	4.51		5.79	40	5.28
19.721	24.48		36			37	0	6	7	13	0	1	64	3.21		4.37	43.79	9.464
11.18	8.07	0.46	10.88			11.96	1.84	4.12	7.21	6.2	0.04	2.57	10.87	1.32	0.67	1.76	14.61	2.07
