# Supplementary material for: Geological Controlling Factors of Low Resistivity Shale and Their Implications on Reservoir Quality: A Case Study in the Southern Sichuan Basin, China
Source: MDPI journal article supplement (doi:10.3390/en15165801), 2022-08-10
Supplement: s1 [file s1 › Table S2.xlsx]

## Sheet: Sheet1
Well	Sample Depth (m)	Before experiment		After experiment		Change before and after the experiment
		Mass of sample /g	Water Saturation /%	Mass of sample /g	Water Saturation /%	Change of sample mass /g	Change of water Saturation /%
L4	4243.09	52.342	45.2	52.382	50.3	0.04	5.1
L4	4265.99	54.216	44.2	54.231	46.1	0.015	1.9
L4	4233.83	54.206	34	54.2116	34.8	0.0056	0.8
L2	4041.92	54.142	23	54.143	23.4	0.001	0.4
L4	4030.9	54.069	11.6	54.0683	11.8	-0.0007	0.2
L2	4033.97	54.023	3.9	54.022	4	-0.001	0.1
