# Supplementary material for: Geological Controlling Factors of Low Resistivity Shale and Their Implications on Reservoir Quality: A Case Study in the Southern Sichuan Basin, China
Source: MDPI journal article supplement (doi:10.3390/en15165801), 2022-08-10
Supplement: s1 [file s1 › Table S3.xlsx]

## Sheet: Sheet1
Table S2. Comparison of key parameters of 3D seismic acquisition in the Luzhou block and Changning block
Area	Changning block	Luzhou block
Construction year	2019	2021
Observation system	18×L3S×220R	36×L6×S224R
Full coverage area(km2)	150	1229
Coverage times	154(14×11)	252（18x14）
Bin size（m）	20×40	20x20
Number of receiving channels	3960	8064
Interval of receiving lines（m）	400	240
Trace density	19	63
Aspect ratio	0.76	0.94
