# Supplementary material for: Geological Controlling Factors of Low Resistivity Shale and Their Implications on Reservoir Quality: A Case Study in the Southern Sichuan Basin, China
Source: MDPI journal article supplement (doi:10.3390/en15165801), 2022-08-10
Supplement: s1 [file s1 › Table S4.xlsx]

## Sheet: Sheet1
Table S4. Uncertainty qualification and 95% confidence interval given by bootstrap method of 518 samples
Reservoir property	Average	Standard deviation
Resistivity(Ω·m)	[11.67,13.81]	[8.62,15.38]
Illite Content (%)	[20.11,21.41]	[7.66,8.56]
Ro (%)	[3.16,3.55]	[0.28,0.88]
Clay minerals (%)	[20.93,31.73]	[10.19,11.56]
Quartz (%)	[40.99,42.96]	[11.26,12.81]
Orthoclase (%)	[0.7,0.99]	[1.5,2.26]
Plagioclase(%)	[6.4,7.03]	[3.81,4.37]
Calcite (%)	[8.82,10.17]	[5.95,8.32]
Dolomite (%)	[6.4,7.52]	[5.39,6.89]
Siderite (%)	[0,0.01]	[0,0]
Pyrite (%)	[2.72,3.14]	[1.9,3.34]
Brittle mineral (%)	[67.92,70.05]	[10.24,11.97]
TOC(%)	[2.42,2.67]	[1.22,1.41]
TOS(%)	[1.13,1.52]	[0.48, 0.85]
Porosity (%)	[4.15,4.45]	[1.66,1.83]
Water Saturation (%)	[41.49,43.82]	[13.60,15.63]
Total gas content (m3/t)	[2.92,3.3]	[1.91,2.18]
