# Supplementary figures and images for: Geological Controlling Factors of Low Resistivity Shale and Their Implications on Reservoir Quality: A Case Study in the Southern Sichuan Basin, China
Source: MDPI journal article supplement (doi:10.3390/en15165801), 2022-08-10

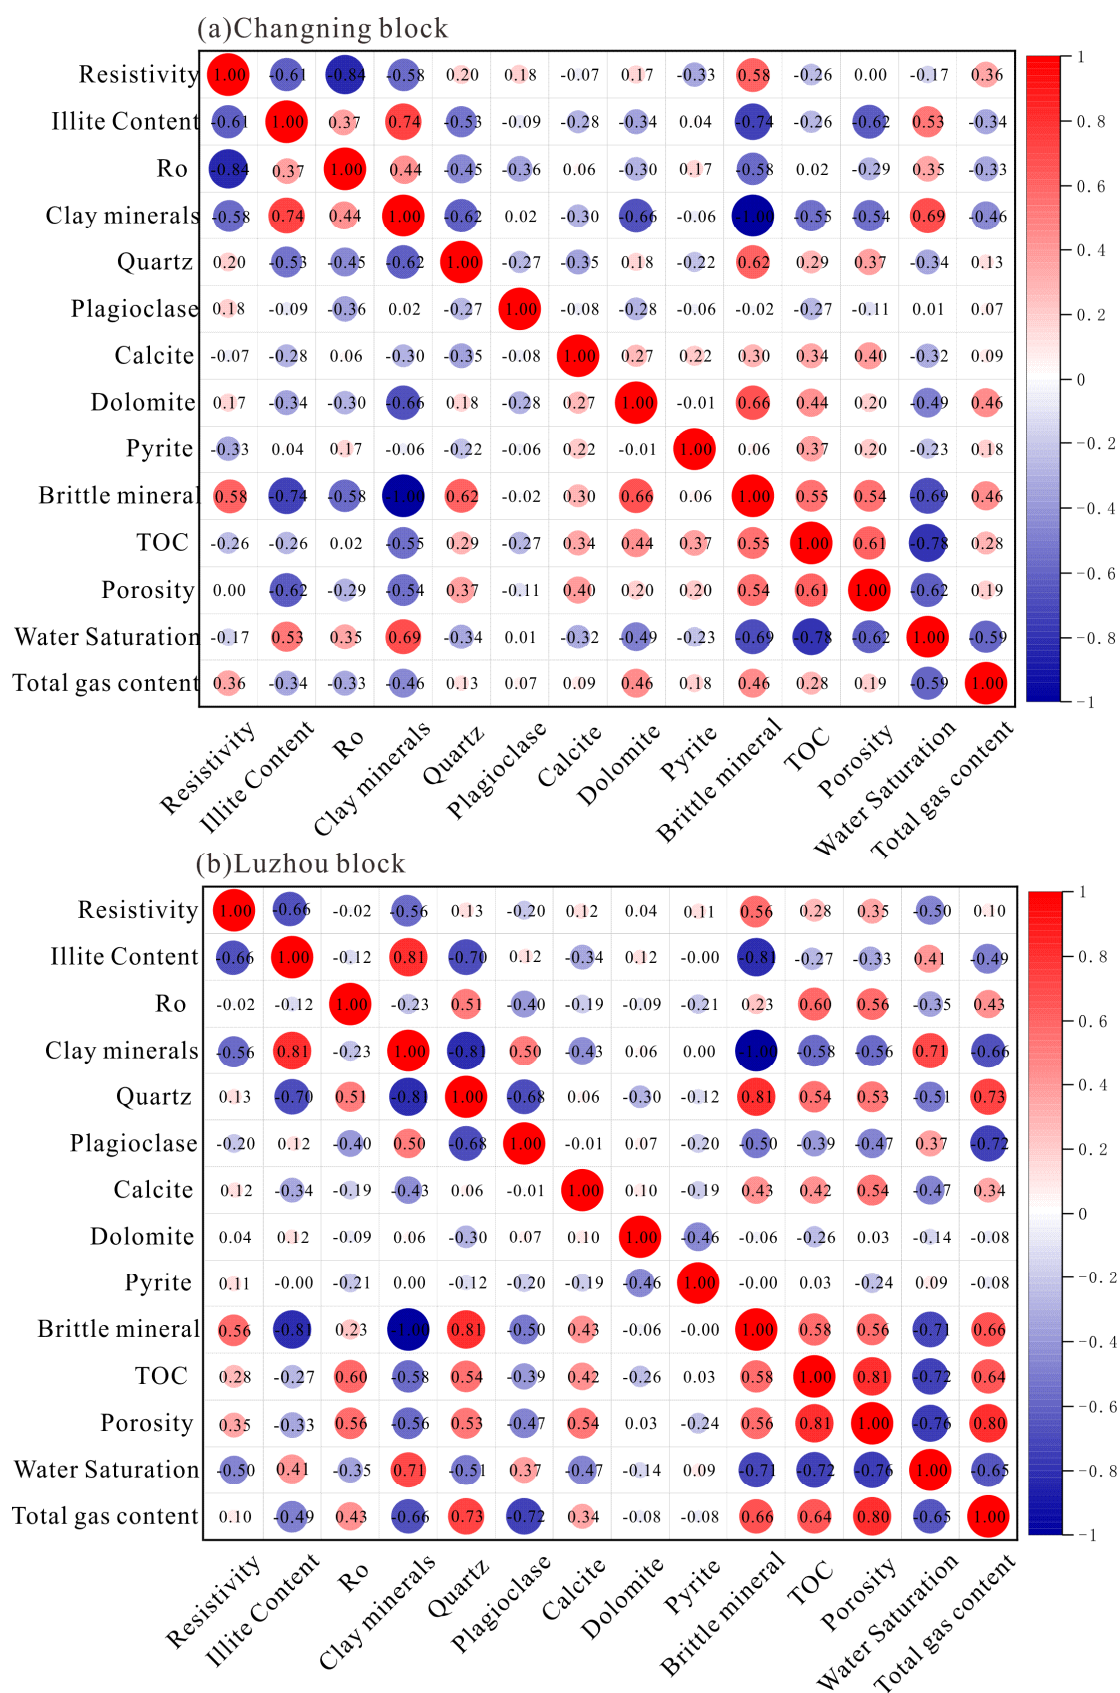

Figure S1. (a) Changning block, (b) Luzhou block.

Supplement: s1 [file s1]
